# Supplementary material
Source: MDPI journal article supplement (https://www.mdpi.com/2073-4433/13/12/1980)
Supplement: s1 [file s1]

Archive with 3 entries (3 files):
- Annex_1_maps.pdf
- Annex_2_meteo_stations.pdf
- atmosphere-1991709-supplementary.pdf
