# Supplementary material
Source: MDPI journal article supplement (https://www.mdpi.com/2073-4433/13/12/1980)
Supplement: s1 [file s1]

## Supplementary Materials:

**Table S1.** Linear model results, daily averaged net ecosystem exchange (NEE), gross primary production (GPP) and ecosystem respiration ( $R_{eco}$ ), as function of ambient temperature ( $T_a$ ), evapotranspiration (ET), and normalized vegetation index (NDVI). Model estimates, standard errors (SE), and p-values: '\*\*\*'  $p < 0.001$ , '\*\*'  $p < 0.05$ , not significant (ns)  $p > 0.05$ .

|                                  | NEE      |       |         | GPP      |       |         | $R_{eco}$ |       |         |
|----------------------------------|----------|-------|---------|----------|-------|---------|-----------|-------|---------|
|                                  | Estimate | SE    | p-value | Estimate | SE    | p-value | Estimate  | SE    | p-value |
| (Intercept)                      | 0.94     | 0.06  | ***     | -0.50    | 0.05  | ***     | 0.45      | 0.04  | ***     |
| $T_a$                            | 0.064    | 0.008 | ***     | 0.146    | 0.007 | ***     | 0.221     | 0.006 | ***     |
| ET                               | -11.1    | 0.6   | ***     | 14.9     | 0.6   | ***     | 3.6       | 0.5   | ***     |
| NDVI                             | -3.0     | 0.2   | ***     | 4.7      | 0.1   | ***     | 2.1       | 0.1   | ***     |
| Site (BERT)                      | -0.94    | 0.09  | ***     | 0.42     | 0.08  | ***     | -0.43     | 0.06  | ***     |
| Site (RIART)                     | -0.06    | 0.09  | ns      | -0.31    | 0.08  | ***     | -0.56     | 0.07  | ***     |
| $T_a \times \text{site (BERT)}$  | 0.02     | 0.01  | ns      | -0.113   | 0.009 | ***     | -0.132    | 0.007 | ***     |
| $T_a \times \text{site (RIART)}$ | -0.019   | 0.009 | *       | -0.135   | 0.008 | ***     | -0.165    | 0.007 | ***     |
| ET $\times$ site (BERT)          | 7.5      | 0.9   | ***     | -14.9    | 0.6   | ***     | -3.6      | 0.5   | ***     |
| ET $\times$ site (RIART)         | 6.0      | 0.8   | ***     | -8.3     | 0.7   | ***     | 0.1       | 0.6   | ns      |
| NDVI $\times$ site (BERT)        | -2.0     | 0.3   | ***     | 2.8      | 0.2   | ***     | 1.0       | 0.2   | ***     |
| NDVI $\times$ site (RIART)       | -3.4     | 0.2   | ***     | 2.0      | 0.2   | ***     | -1.1      | 0.1   | ***     |
| Adjusted $R^2$                   | 0.44     |       |         | 0.68     |       |         | 0.59      |       |         |

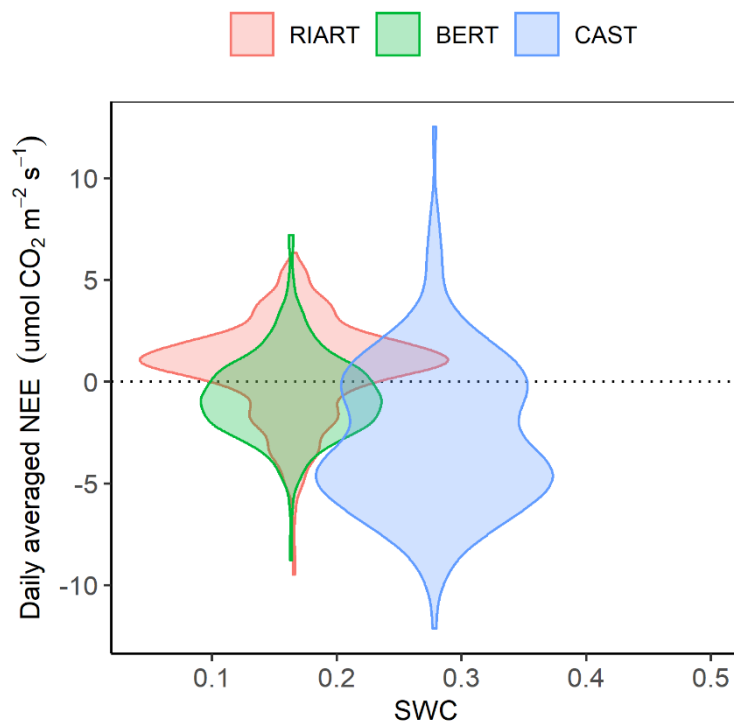

**Figure S1** Data distribution, net ecosystem exchange (NEE) as function of soil water content (SWC).
