# Supplementary material
Source: MDPI journal article supplement (https://www.mdpi.com/2073-4433/13/12/1980)

## CLOSEST METEOROLOGICAL STATIONS TO THE STUDY SITES

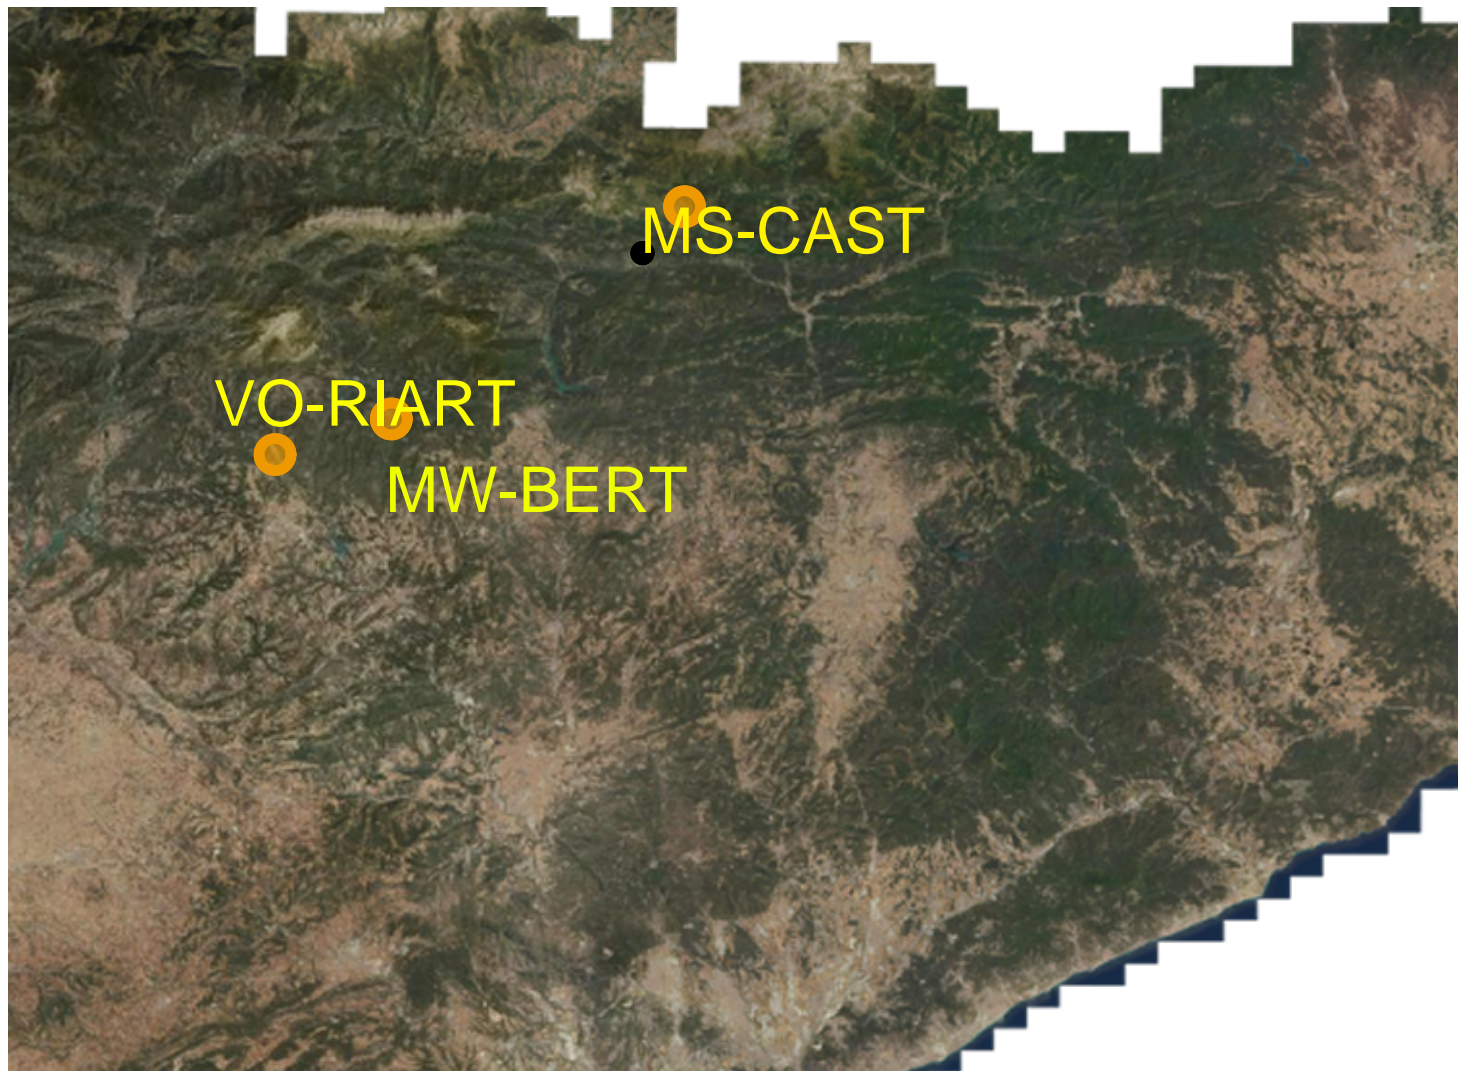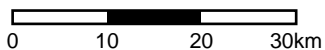

Meteorological data can be downloaded from the following links  
<https://www.meteo.cat/observacions/xema/dades?codi=VO>  
<https://www.meteo.cat/observacions/xema/dades?codi=MW>  
<https://www.meteo.cat/observacions/xema/dades?codi=MS>

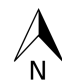

Supplement: s1 [file s1]
