# Supplementary material
Source: MDPI journal article supplement (https://www.mdpi.com/2073-4433/13/12/1980)

# RIART

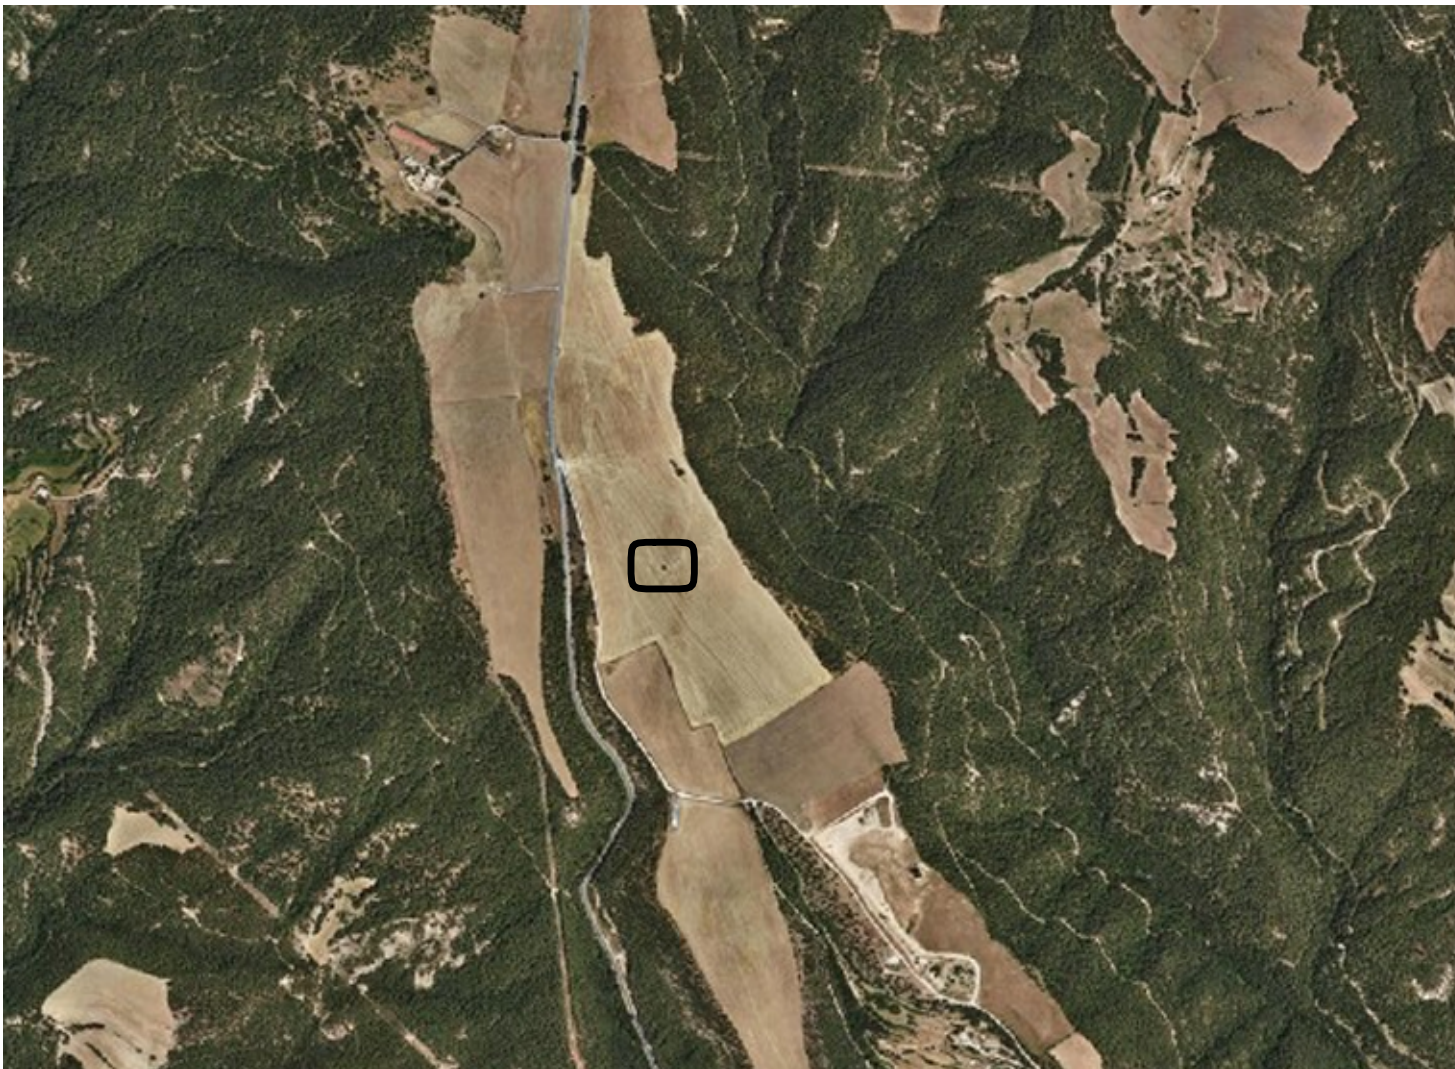

0 200 400 600m

 Eddy covariance flux station

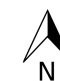



# BERT

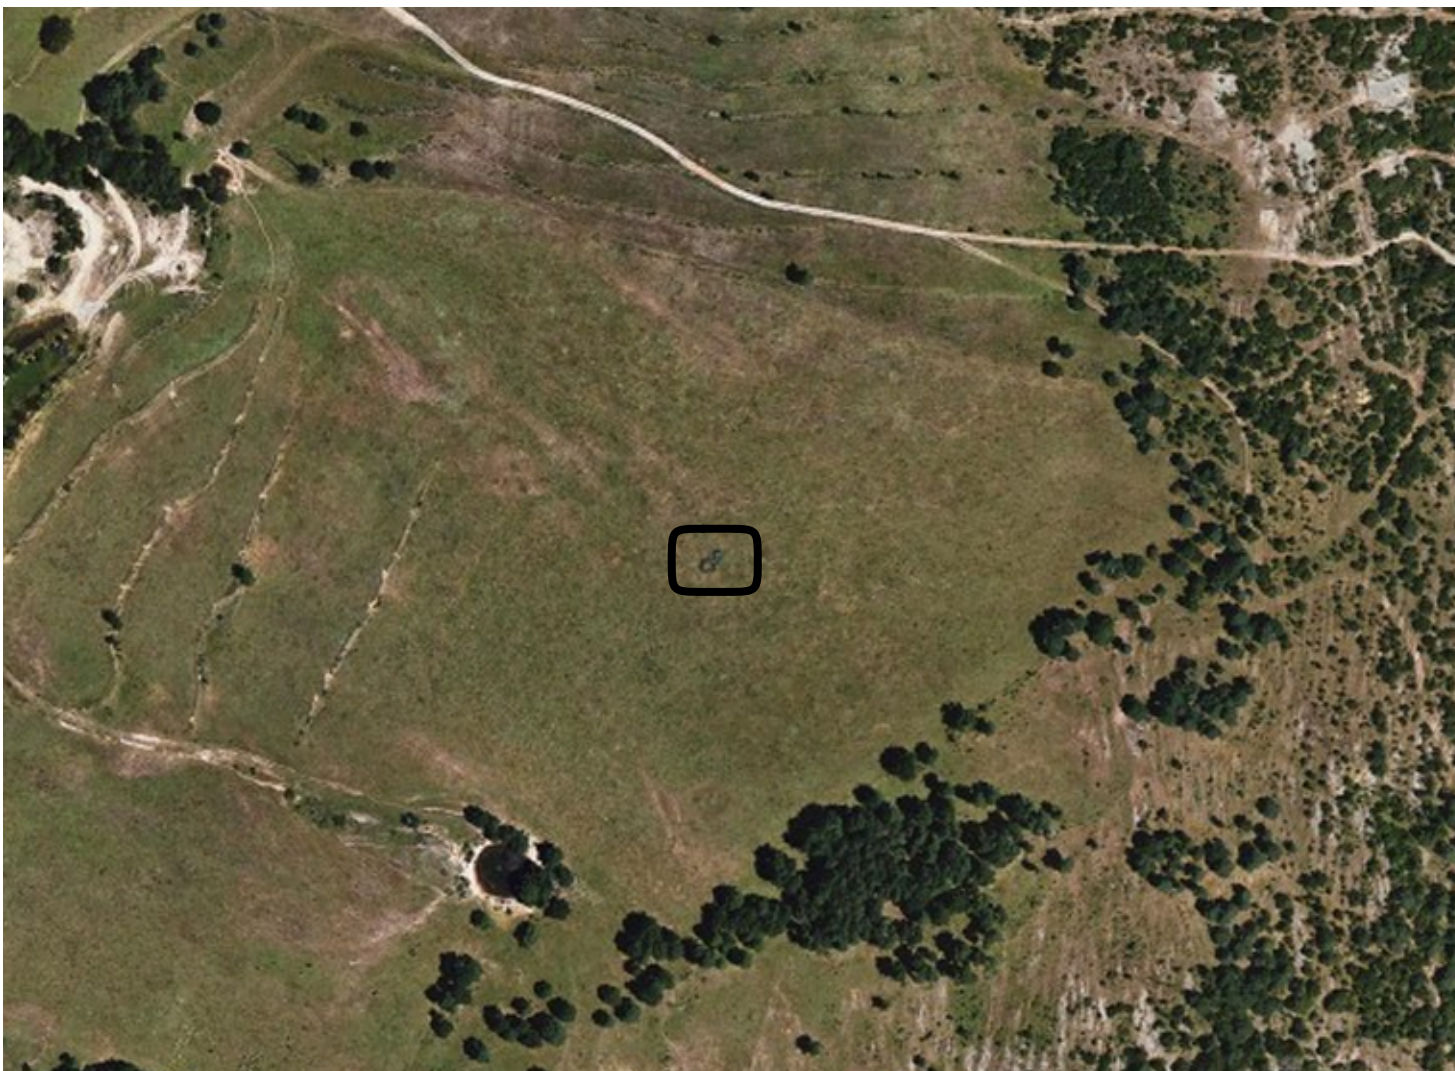

0 20 40 60m

 Eddy covariance flux station

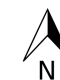



# CAST

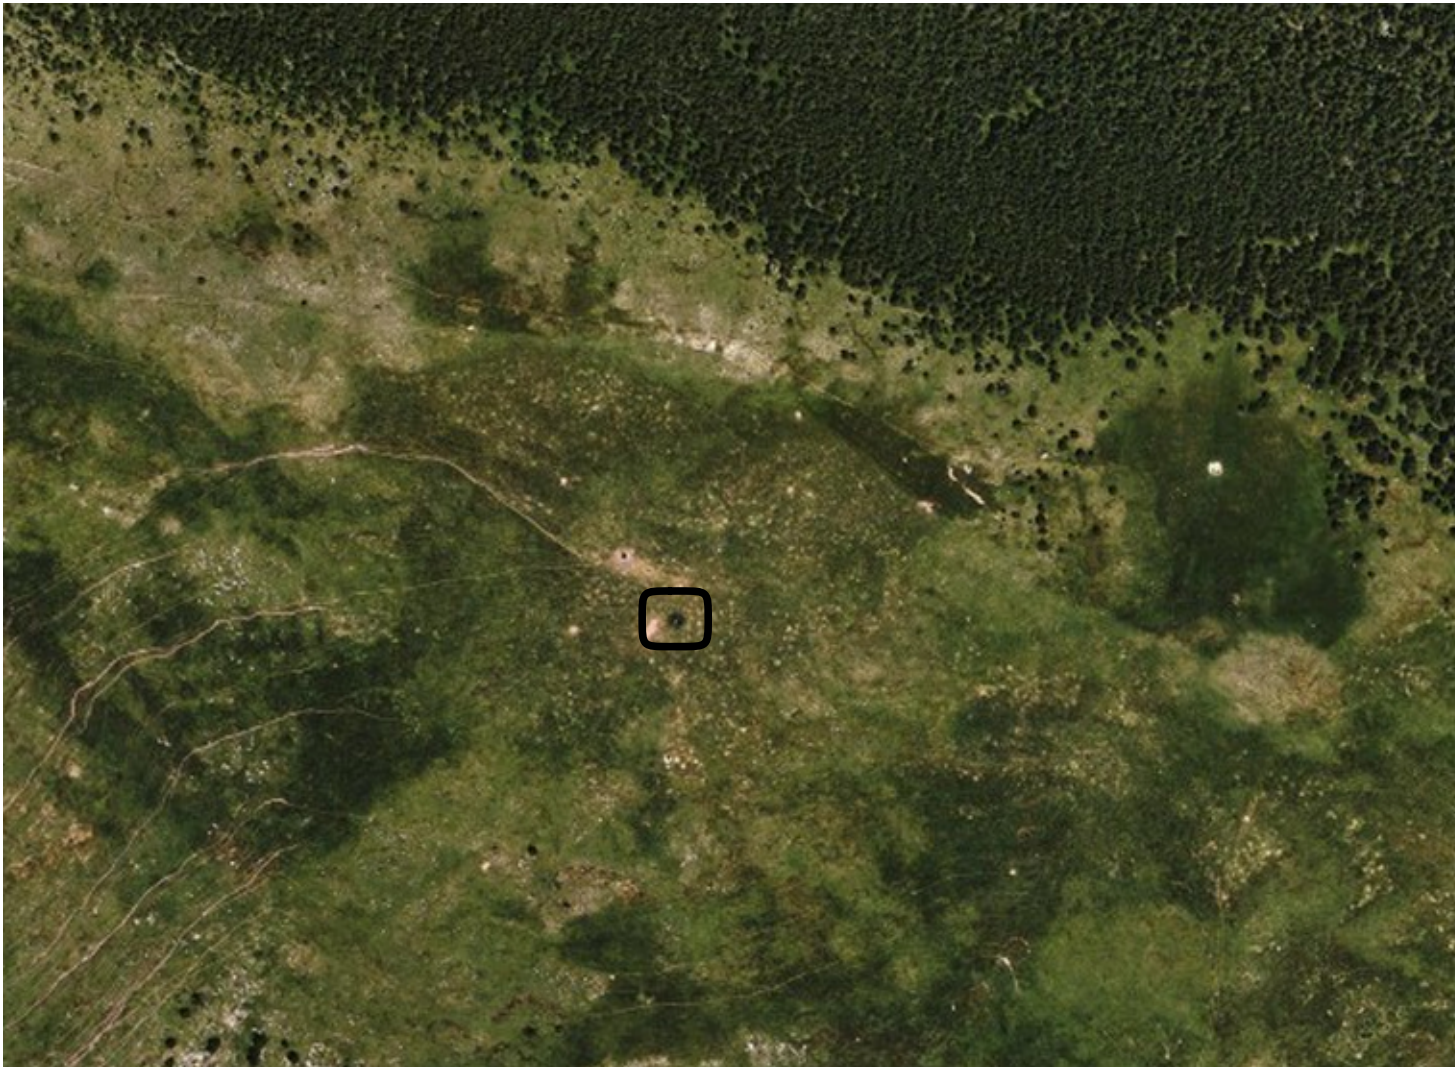

0 20 40 60m

 Eddy covariance flux station

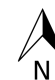

Supplement: s1 [file s1]
